# Supplementary material for: Ancient DNA Reveals Prehistoric Gene-Flow from Siberia in the Complex Human Population History of North East Europe
Source: PubMed Central journal article supplement (PMC3573127; doi:10.1371/journal.pgen.1003296), 2013-02-14
Supplement: pgen.1003296.s001.pdf [file pgen.1003296.s001.pdf]

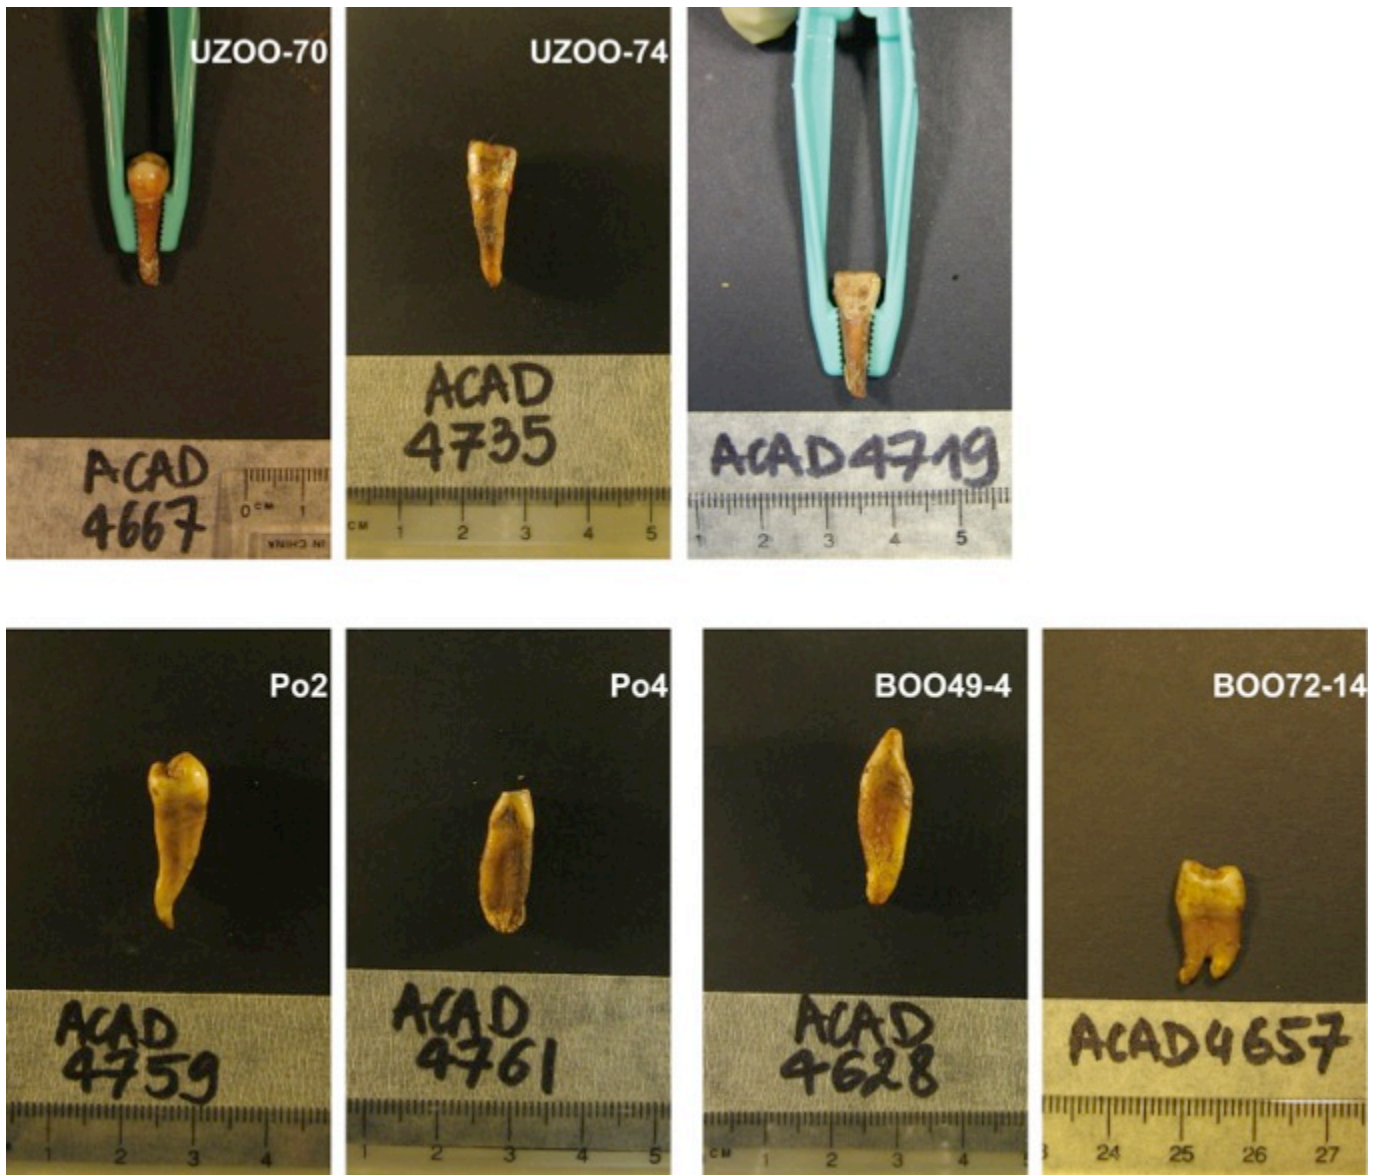

**Figure S1. Pictures of selected samples from Yuzhnyy Oleni Ostrov, Popovo and Bol'shoy Oleni Ostrov.** The macroscopic preservation of the selected samples is representative of the general preservation observed in the corresponding sites. Yuzhnyy Oleni Ostrov sample ACAD4719 did not yield reliable mitochondrial hypervariable region I sequences.
