# Supplementary material for: Ancient DNA Reveals Prehistoric Gene-Flow from Siberia in the Complex Human Population History of North East Europe
Source: PubMed Central journal article supplement (PMC3573127; doi:10.1371/journal.pgen.1003296), 2013-02-14
Supplement: pgen.1003296.s003.pdf [file pgen.1003296.s003.pdf]

| rCRS                             | 16,000       | 16,020         | 16,040         | 16,060    | 16,080 | 16,100 | 16,120 | 16,140 | 16,160 | 16,1 |    |
|----------------------------------|--------------|----------------|----------------|-----------|--------|--------|--------|--------|--------|------|----|
| UZ0077_1_np_16055-16142_R1       | AGC          | AAG            | ATC            | AA        | AA     | ATC    | CT     | CT     | CT     | CT   | CT |
| UZ0077_1_np_16055-16142_F1       |              |                |                |           |        |        |        |        |        |      |    |
| UZ0077_1_np_16055-16142_F2       |              |                |                |           |        |        |        |        |        |      |    |
| UZ0077_1_np_16055-16142_F3       |              |                |                |           |        |        |        |        |        |      |    |
| UZ0077_2_np_15996-16142_R1       |              |                |                |           |        |        |        |        |        |      |    |
| UZ0077_2_np_15996-16142_clone1r  |              |                |                |           |        |        |        |        |        |      |    |
| UZ0077_2_np_15996-16142_clone2r  |              |                |                |           |        |        |        |        |        |      |    |
| UZ0077_2_np_15996-16142_clone3r  |              |                |                |           |        |        |        |        |        |      |    |
| UZ0077_2_np_15996-16142_clone4r  |              |                |                |           |        |        |        |        |        |      |    |
| UZ0077_2_np_15996-16142_clone5r  |              |                |                |           |        |        |        |        |        |      |    |
| UZ0077_2_np_15996-16142_clone6r  |              |                |                |           |        |        |        |        |        |      |    |
| UZ0077_1_np_16117-16218_R1       |              |                |                |           |        |        |        |        |        |      |    |
| UZ0077_1_np_16117-16218_F1       |              |                |                |           |        |        |        |        |        |      |    |
| UZ0077_1_np_16117-16218_F2       |              |                |                |           |        |        |        |        |        |      |    |
| UZ0077_1_np_16117-16218_F3       |              |                |                |           |        |        |        |        |        |      |    |
| UZ0077_1_np_16117-16218_F4       |              |                |                |           |        |        |        |        |        |      |    |
| UZ0077_2_np_16117-16233_R1       |              |                |                |           |        |        |        |        |        |      |    |
| UZ0077_2_np_16117-16233_clone1r  |              |                |                |           |        |        |        |        |        |      |    |
| UZ0077_2_np_16117-16233_clone2r  |              |                |                |           |        |        |        |        |        |      |    |
| UZ0077_2_np_16117-16233_clone3r  |              |                |                |           |        |        |        |        |        |      |    |
| UZ0077_2_np_16117-16233_clone4r  |              |                |                |           |        |        |        |        |        |      |    |
| UZ0077_2_np_16117-16233_F1       |              |                |                |           |        |        |        |        |        |      |    |
| UZ0077_2_np_16117-16233_clone1_2 |              |                |                |           |        |        |        |        |        |      |    |
| UZ0077_2_np_16117-16233_clone3   |              |                |                |           |        |        |        |        |        |      |    |
| UZ0077_2_np_16117-16233_clone4   |              |                |                |           |        |        |        |        |        |      |    |
| UZ0077_2_np_16117-16233_clone5   |              |                |                |           |        |        |        |        |        |      |    |
| UZ0077_1_np_16117-16218_R1       | CATCAAAACCCC |                |                |           |        |        |        |        |        |      |    |
| UZ0077_1_np_16117-16218_R2       | CATCAAAACCCC |                |                |           |        |        |        |        |        |      |    |
| UZ0077_1_np_16117-16218_F1       | CATCAAAACCCC |                |                |           |        |        |        |        |        |      |    |
| UZ0077_1_np_16117-16218_F2       | CATCAAAACCCC |                |                |           |        |        |        |        |        |      |    |
| UZ0077_1_np_16117-16218_F3       | CATCAAAACCCC |                |                |           |        |        |        |        |        |      |    |
| UZ0077_1_np_16117-16218_F4       | CATCAAAACCCC |                |                |           |        |        |        |        |        |      |    |
| UZ0077_2_np_16117-16233_R1       | CATCAAAACCCC |                |                |           |        |        |        |        |        |      |    |
| UZ0077_2_np_16117-16233_clone1r  | CATCAAAACCCC |                |                |           |        |        |        |        |        |      |    |
| UZ0077_2_np_16117-16233_clone2r  | CATCAAAACCCC |                |                |           |        |        |        |        |        |      |    |
| UZ0077_2_np_16117-16233_clone3r  | CATCAAAACCCC |                |                |           |        |        |        |        |        |      |    |
| UZ0077_2_np_16117-16233_clone4r  | CATCAAAACCCC |                |                |           |        |        |        |        |        |      |    |
| UZ0077_2_np_16117-16233_F1       | CATCAAAACCCC |                |                |           |        |        |        |        |        |      |    |
| UZ0077_2_np_16117-16233_clone1_2 | CATCAAAACCCC |                |                |           |        |        |        |        |        |      |    |
| UZ0077_2_np_16117-16233_clone3   | CATCAAAACCCC |                |                |           |        |        |        |        |        |      |    |
| UZ0077_2_np_16117-16233_clone4   | CATCAAAACCCC |                |                |           |        |        |        |        |        |      |    |
| UZ0077_2_np_16117-16233_clone5   | CATCAAAACCCC |                |                |           |        |        |        |        |        |      |    |
| UZ0077_1_np_16209-16303_F1       |              |                |                |           |        |        |        |        |        |      |    |
| UZ0077_1_np_16209-16303_F2       |              |                |                |           |        |        |        |        |        |      |    |
| UZ0077_2_np_16209-16348_R1       |              |                |                |           |        |        |        |        |        |      |    |
| UZ0077_2_np_16209-16348_clone1r  |              |                |                |           |        |        |        |        |        |      |    |
| UZ0077_2_np_16209-16348_clone2r  |              |                |                |           |        |        |        |        |        |      |    |
| UZ0077_2_np_16209-16348_clone3r  |              |                |                |           |        |        |        |        |        |      |    |
| UZ0077_2_np_16209-16348_clone4r  |              |                |                |           |        |        |        |        |        |      |    |
| UZ0077_2_np_16209-16348_clone5r  |              |                |                |           |        |        |        |        |        |      |    |
| UZ0077_2_np_16209-16348_F1       |              |                |                |           |        |        |        |        |        |      |    |
| UZ0077_2_np_16209-16348_clone1   |              |                |                |           |        |        |        |        |        |      |    |
| UZ0077_2_np_16209-16348_clone2   |              |                |                |           |        |        |        |        |        |      |    |
| UZ0077_2_np_16209-16348_clone3   |              |                |                |           |        |        |        |        |        |      |    |
| UZ0077_2_np_16209-16348_clone4   |              |                |                |           |        |        |        |        |        |      |    |
| UZ0077_2_np_16209-16348_clone5   |              |                |                |           |        |        |        |        |        |      |    |
| UZ0077_2_np_16209-16348_clone6   |              |                |                |           |        |        |        |        |        |      |    |
| UZ0077_1_np_16287-16410_R1       |              |                |                |           |        |        |        |        |        |      |    |
| UZ0077_1_np_16287-16410_R2       |              |                |                |           |        |        |        |        |        |      |    |
| UZ0077_1_np_16287-16410_R3       |              |                |                |           |        |        |        |        |        |      |    |
| UZ0077_1_np_16287-16410_F1       |              |                |                |           |        |        |        |        |        |      |    |
| UZ0077_1_np_16287-16410_F2       |              |                |                |           |        |        |        |        |        |      |    |
| UZ0077_2_np_16287-16410_F3       |              |                |                |           |        |        |        |        |        |      |    |
| UZ0077_2_np_16287-16410_R1       |              |                |                |           |        |        |        |        |        |      |    |
| UZ0077_2_np_16287-16410_clone1r  |              |                |                |           |        |        |        |        |        |      |    |
| UZ0077_2_np_16287-16410_clone2r  |              |                |                |           |        |        |        |        |        |      |    |
| UZ0077_2_np_16287-16410_clone3r  |              |                |                |           |        |        |        |        |        |      |    |
| UZ0077_2_np_16287-16410_F1       |              |                |                |           |        |        |        |        |        |      |    |
| UZ0077_2_np_16287-16410_clone1   |              |                |                |           |        |        |        |        |        |      |    |
| UZ0077_2_np_16287-16410_clone2   |              |                |                |           |        |        |        |        |        |      |    |
| UZ0077_2_np_16287-16410_clone3   |              |                |                |           |        |        |        |        |        |      |    |
| UZ0077_2_np_16287-16410_clone4   |              |                |                |           |        |        |        |        |        |      |    |
| rCRS                             | 16,360       | 16,380         | 16,400         | 16,420    | 16,440 | 16,460 | 16,480 | 16,500 | 16,520 |      |    |
| UZ0077_1_np_16287-16410_R1       | AAATCCCTTC   | CCCATGGATGACCC | CCCTCAGATAGGGG | CTTGACACC |        |        |        |        |        |      |    |
| UZ0077_1_np_16287-16410_R2       | AAATCCCTTC   | CCCATGGATGACCC | CCCTCAGATAGGGG | CTTGACACC |        |        |        |        |        |      |    |
| UZ0077_1_np_16287-16410_R3       | AAATCCCTTC   | CCCATGGATGACCC | CCCTCAGATAGGGG | CTTGACACC |        |        |        |        |        |      |    |
| UZ0077_1_np_16287-16410_F1       | AAATCCCTTC   | CCCATGGATGACCC | CCCTCAGATAGGGG | CTTGACACC |        |        |        |        |        |      |    |
| UZ0077_1_np_16287-16410_F2       | AAATCCCTTC   | CCCATGGATGACCC | CCCTCAGATAGGGG | CTTGACACC |        |        |        |        |        |      |    |
| UZ0077_1_np_16287-16410_F3       | AAATCCCTTC   | CCCATGGATGACCC | CCCTCAGATAGGGG | CTTGACACC |        |        |        |        |        |      |    |
| UZ0077_2_np_16287-16410_R1       | AAATCCCTTC   | CCCATGGATGACCC | CCCTCAGATAGGGG | CTTGACACC |        |        |        |        |        |      |    |
| UZ0077_2_np_16287-16410_clone1r  | AAATCCCTTC   | CCCATGGATGACCC | CCCTCAGATAGGGG | CTTGACACC |        |        |        |        |        |      |    |
| UZ0077_2_np_16287-16410_clone2r  | AAATCCCTTC   | CCCATGGATGACCC | CCCTCAGATAGGGG | CTTGACACC |        |        |        |        |        |      |    |
| UZ0077_2_np_16287-16410_clone3r  | AAATCCCTTC   | CCCATGGATGACCC | CCCTCAGATAGGGG | CTTGACACC |        |        |        |        |        |      |    |
| UZ0077_2_np_16287-16410_F1       | AAATCCCTTC   | CCCATGGATGACCC | CCCTCAGATAGGGG | CTTGACACC |        |        |        |        |        |      |    |
| UZ0077_2_np_16287-16410_clone1   | AAATCCCTTC   | CCCATGGATGACCC | CCCTCAGATAGGGG | CTTGACACC |        |        |        |        |        |      |    |
| UZ0077_2_np_16287-16410_clone2   | AAATCCCTTC   | CCCATGGATGACCC | CCCTCAGATAGGGG | CTTGACACC |        |        |        |        |        |      |    |
| UZ0077_2_np_16287-16410_clone3   | AAATCCCTTC   | CCCATGGATGACCC | CCCTCAGATAGGGG | CTTGACACC |        |        |        |        |        |      |    |
| UZ0077_2_np_16287-16410_clone4   | AAATCCCTTC   | CCCATGGATGACCC | CCCTCAGATAGGGG | CTTGACACC |        |        |        |        |        |      |    |

A- Direct sequences and clone sequences for Yuzhny Oleni Ostrov individual UZ0077

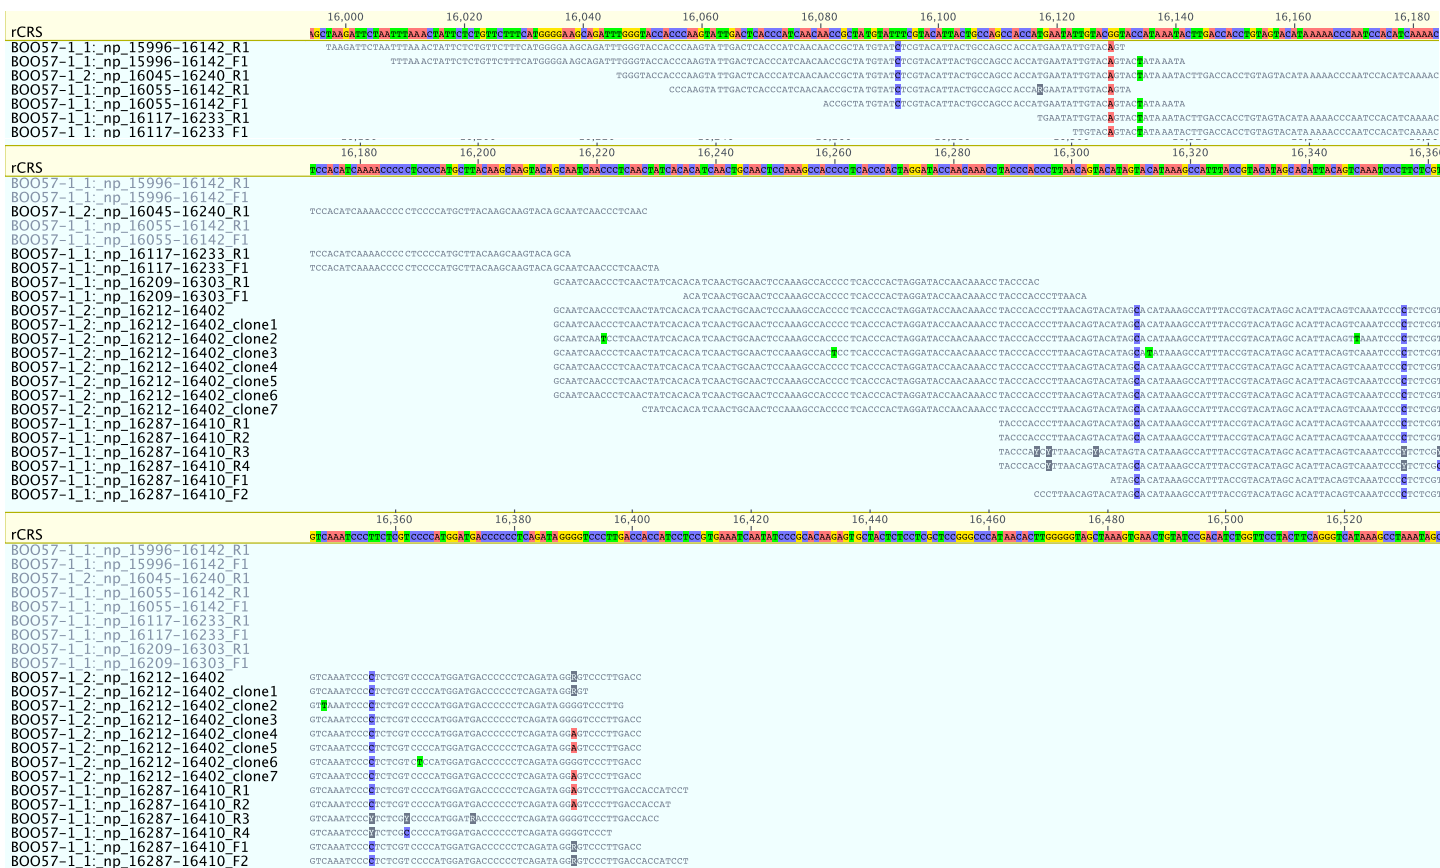

## B- Direct sequences and clone sequences for Bol'shoy Oleni Ostrov individual BOO57-1

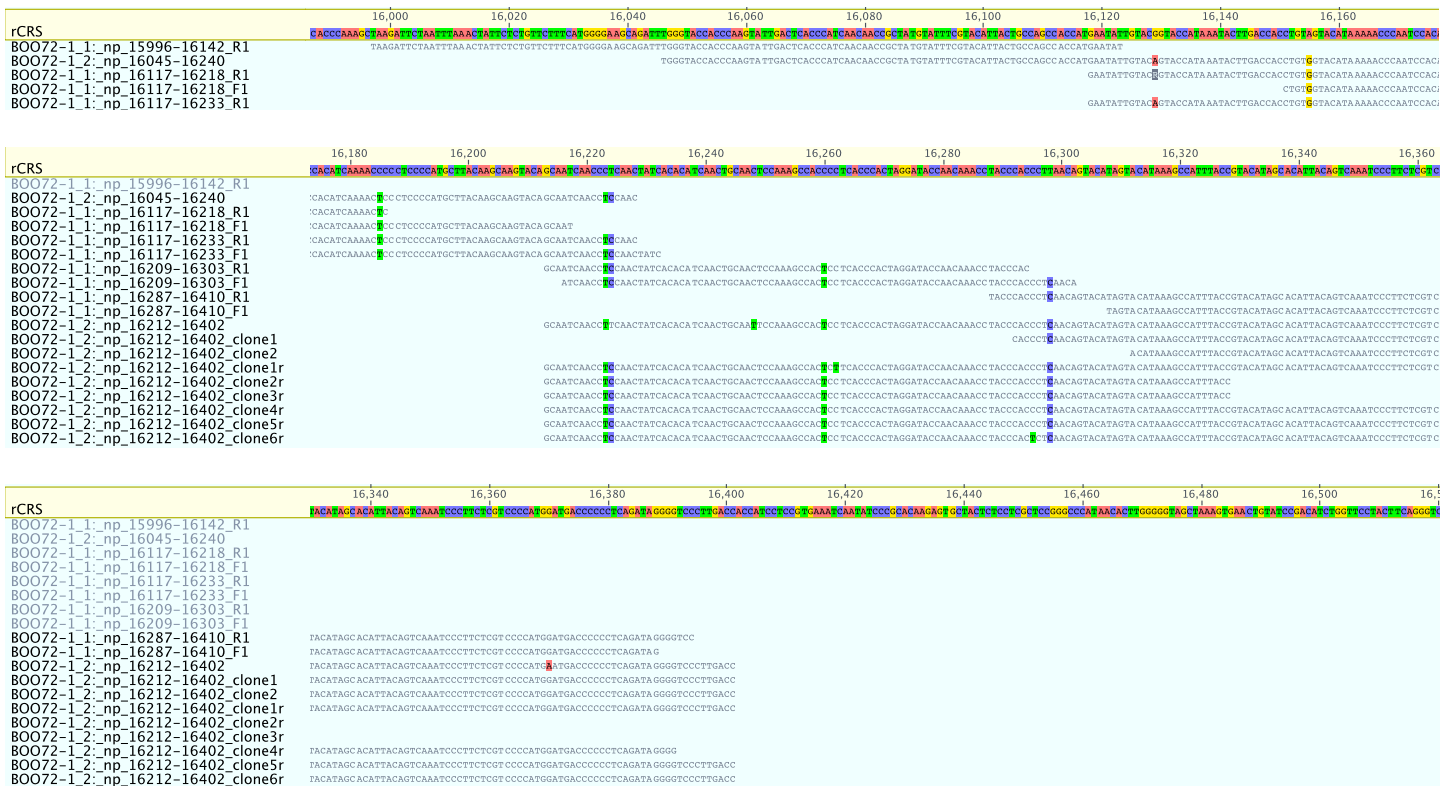

## C- Direct sequences and clone sequences for Bol'shoy Oleni Ostrov individual BOO72-1



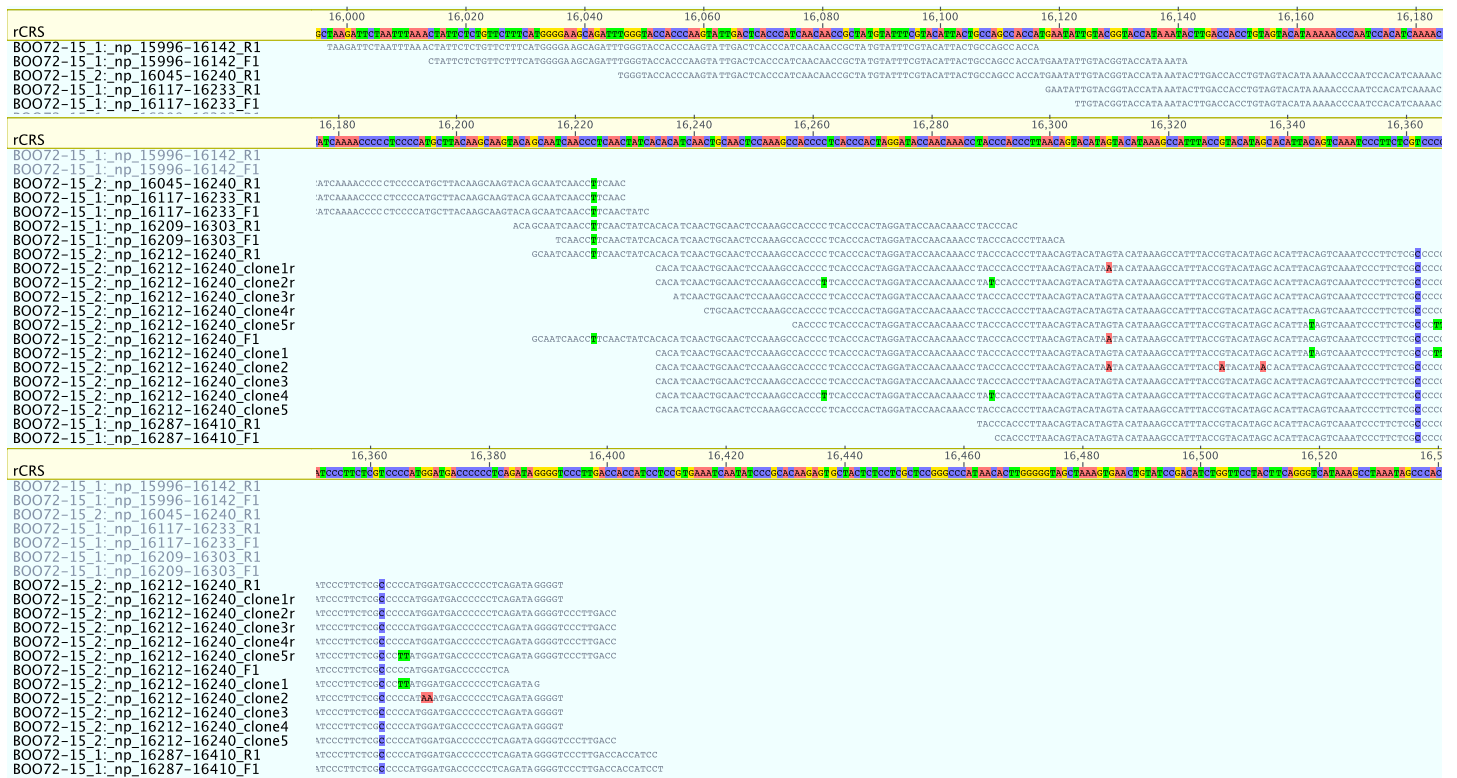

F- Direct sequences and clone sequences for Bol'shoy Oleni Ostrov individual BOO72-15

**Figure S3. Direct and clone sequences for six selected samples.** A. UZOO77. B. BOO57-1. C. BOO72-1. D. BOO72-4. E. BOO72-7. F. BOO72-15. “\_1” after the individual identification number signifies that the sequences have been obtained after DNA extraction and sequencing from a first sample at the Australian Centre for Ancient DNA. “\_2” after the individual identification number signifies that the sequences have been obtained after DNA extraction, cloning and sequencing from a second sample at the Institute of Anthropology, Johannes Gutenberg University of Mainz.
