# Supplementary material for: Ancient DNA Reveals Prehistoric Gene-Flow from Siberia in the Complex Human Population History of North East Europe
Source: PubMed Central journal article supplement (PMC3573127; doi:10.1371/journal.pgen.1003296), 2013-02-14
Supplement: pgen.1003296.s004.pdf [file pgen.1003296.s004.pdf]

**Table S1. Description and references for hg C1 HVR-I sequences found in modern-day populations of Eurasia.**

| <b>C1 clade</b> | <b>Geographic /Ethnic origin</b> | <b>HVR-I sequence (np 16056-16409), Minus np 16000</b> | <b>Reference</b> |
|-----------------|----------------------------------|--------------------------------------------------------|------------------|
| C1?             | Lebanese                         | 223T-266T-298C-325C-327T                               | [1]              |
| C1?             | Lebanese                         | 223T-266T-298C-325C-327T                               | [1]              |
| C1?             | Bashkir                          | 223T-298C-325C-327T-362C                               | [2]              |
| C1?             | Bashkir                          | 223T-298C-325C-327T-362C                               | [2]              |
| C1?             | Bashkir                          | 223T-298C-325C-327T-362C                               | [2]              |
| C1?             | Icelander                        | 223T-298C-311C-325C-327T                               | [3]              |
| C1?             | Icelander                        | 223T-298C-311C-325C-327T                               | [3]              |
| C1?             | Icelander                        | 223T-298C-311C-325C-327T                               | [4]              |
| C1?             | Thai                             | 223T-298C-311C-325C-327T-357C                          | [1]              |
| C1?             | Indian                           | 093C-223T-298C-325C-327T-362C                          | [5]              |
| C1?             | Indian                           | 093C-223T-298C-325C-327T-362C                          | [5]              |
| C1?             | Indian                           | 093C-223T-298C-325C-327T-362C                          | [5]              |
| C1?             | Indian                           | 093C-223T-298C-325C-327T-362C                          | [5]              |
| C1?             | Indian                           | 093C-223T-298C-325C-327T-362C                          | [5]              |
| C1?             | Indian                           | 093C-223T-298C-325C-327T-362C                          | [5]              |
| C1?             | German                           | 223T-298C-311C-325C-327T                               | [6]              |
| C1?             | Canary Islander                  | 223T-298C-325C-327T                                    | [7]              |
| C1a             | Altaiian                         | 223T-298C-325C-327T-356C                               | [1]              |
| C1a             | Altaiian                         | 223T-298C-325C-327T-356C                               | [1]              |
| C1a             | Orok                             | 223T-298C-325C-327T-356C                               | [8]              |
| C1a             | Orok                             | 223T-298C-325C-327T-356C                               | [8]              |
| C1a             | Orok                             | 223T-298C-325C-327T-356C                               | [8]              |
| C1a             | Orok                             | 223T-298C-325C-327T-356C                               | [8]              |
| C1a             | Orok                             | 223T-298C-325C-327T-356C                               | [8]              |
| C1a             | Orok                             | 223T-298C-325C-327T-356C                               | [8]              |
| C1a             | Orok                             | 223T-298C-325C-327T-356C                               | [8]              |
| C1a             | Orok                             | 223T-298C-325C-327T-356C                               | [8]              |
| C1a             | Highland Kirghiz                 | 223T-298C-311C-325C-327T-356C                          | [9]              |
| C1a             | Japanese                         | 223T-298C-325C-327T-356C                               | [10]             |
| C1a             | Japanese                         | 223T-298C-325C-327T-356C                               | [11]             |
| C1a             | Japanese                         | 093C-223T-298C-325C-327T-356C                          | [11]             |
| C1a             | Mongolian                        | 093C-223T-298C-325C-327T-356C                          | [12]             |
| C1a             | Mongolian                        | 093C-223T-298C-325C-327T-356C                          | [12]             |
| C1a             | Daur                             | 093C-223T-298C-325C-327T-356C                          | [13]             |
| C1a             | Korean                           | 093C-223T-298C-325C-327T-356C                          | [14]             |
| C1a             | Kalmyk                           | 223T-298C-325C-327T-356C                               | [15]             |
| C1a             | Kalmyk                           | 223T-298C-325C-327T-356C                               | [15]             |
| C1a             | Buryat                           | 223T-298C-325C-327T-356C                               | [1]              |
| C1a             | Buryat                           | 223T-298C-325C-327T-356C                               | [1]              |
| C1a             | Buryat                           | 223T-298C-325C-327T-356C                               | [1]              |
| C1a             | Buryat                           | 223T-298C-325C-327T-356C                               | [1]              |
| C1a             | Buryat                           | 223T-298C-325C-327T-356C                               | [1]              |
| C1a             | Buryat                           | 223T-298C-325C-327T-356C                               | [1]              |
| C1a             | Ulchi                            | 223T-298C-325C-327T-356C                               | [16]             |
| C1a             | Ulchi                            | 223T-298C-325C-327T-356C                               | [16]             |
| C1a             | Japanese                         | 093C-223T-298C-325C-327T-356C                          | [17]             |
| C1a             | Buryat                           | 223T-298C-325C-327T-356C                               | [17]             |
| C1a             | Japanese                         | 093C-192T-223T-298C-325C-327T-356C                     | [18]             |

## References

1. Balanovsky, personal communication
2. Bermisheva M, Tambets K, Villems R, Khusnutdinova E (2002) Diversity of mitochondrial DNA haplotypes in ethnic populations of the Volga-Ural region of Russia. *Mol Biol* 36: 990-1001.
3. Helgason A, Sigureðardóttir S, Gulcher JR, Ward R, Stefánsson K (2000) mtDNA and the origin of the Icelanders: deciphering signals of recent population history. *Am J Hum Genet* 66:999-1016.
4. Helgason A, Nicholson G, Stefánsson K, Donnelly P (2003) A reassessment of genetic diversity in Icelanders: strong evidence from multiple loci for relative homogeneity caused by genetic drift. *Ann Hum Genet* 67:281-297.
5. Metspalu M, Kivisild T, Metspalu E, Parik J, Hudjashov G, et al. (2004) Most of the extant mtDNA boundaries in south and southwest Asia were likely shaped during the initial settlement of Eurasia by anatomically modern humans. *BMC Genet* 5:26.
6. Pfeiffer H, Brinkmann B, Hühne J, Rolf B, Morris A A, et al. (1999) Expanding the forensic German mitochondrial DNA control region database: genetic diversity as a function of sample size and microgeography. *Int J Legal Med* 112:291-298.
7. Rando JC, Cabrera VM, Larruga JM, Hernandez M, Gonzalez AM, et al. (1999). Phylogeographic patterns of mtDNA reflecting the colonization of the Canary Islands. *Ann Hum Genet* 63:413-428.
8. Bermisheva MA, Kutuev IA, Spitsyn VA, Villems R, Batyrova AZ, et al. (2005) Analysis of mitochondrial DNA variation in the population of Oroks. *Genetika* 41:78-84.
9. Comas D, Calafell F, Mateu E, Pérez-Lezaun A, Bosch E, et al. (1998) Trading genes along the silk road: mtDNA sequences and the origin of Central Asian populations. *Am J Hum Genet* 63:1824-1838.
10. Horai S, Hayasaka K (1990) Intraspecific nucleotide sequence differences in the major noncoding region of human mitochondrial DNA. *Am J Hum Genet* 46:828-42.

11. Imaizumi K, Parsons TJ, Yoshino M, Holland MM (2002) A new database of mitochondrial DNA hypervariable regions I and II sequences from 162 Japanese individuals. *Int J Legal Med* 116:68-73.
12. Kolman CJ, Sambuughin N, Bermingham E (1996) Mitochondrial DNA analysis of Mongolian populations and implications for the origin of New World founders. *Genetics* 142:1321-34.
13. Kong Q P, Yao Y G, Sun C, Bandelt H J, Zhu C L, Zhang Y P (2003) Phylogeny of East Asian mitochondrial DNA lineages inferred from complete sequences. *Am J Hum Genet* 73: 671-676.
14. Lee HY, Yoo JE, Park MJ, Chung U, Shin KJ (2006) Mitochondrial DNA control region sequences in Koreans: identification of useful variable sites and phylogenetic analysis for mtDNA data quality control. *Int J Legal Med* 120:5-14.
15. Nasidze I, Quinque D, Dupanloup I, Cordaux R, Kokshunova L, et al. (2005) Genetic evidence for the Mongolian ancestry of Kalmyks. *Am J Phys Anthropol* 128:846-54.
16. Starikovskaya EB, Sukernik RI, Derbeneva OA, Volodko NV, Ruiz-Pesini E, et al. (2005) Mitochondrial DNA diversity in indigenous populations of the southern extent of Siberia, and the origins of Native American haplogroups. *Ann Hum Genet* 69:67-89.
17. Tajima A, Hayami M, Tokunaga K, Juji T, Matsuo M, et al. (2004) Genetic origins of the Ainu inferred from combined DNA analyses of maternal and paternal lineages. *J Hum Genet* 49:187-93.
18. Tanaka M, Cabrera VM, González AM, Larruga JM, Takeyasu T, et al. (2004) Mitochondrial genome variation in eastern Asia and the peopling of Japan. *Genome Res* 14:1832-50.
