# Supplementary material for: Ancient DNA Reveals Prehistoric Gene-Flow from Siberia in the Complex Human Population History of North East Europe
Source: PubMed Central journal article supplement (PMC3573127; doi:10.1371/journal.pgen.1003296), 2013-02-14
Supplement: pgen.1003296.s006.pdf [file pgen.1003296.s006.pdf]

**Table S3. Results of SNP typing in the mtDNA coding region using the GenoCore22 SNaPshot assay.**

|         |           | 13928_R9 | 3594_L3/4 | 10550_K | 11467_U | 4248_A | 8994_W | 13263_C | 13368_T | 11719_preHV, R0 | 8280delB | 4580_V | 6371_X | 10238_N1 | 7028_H | 10034_I | 5178_D | 14766_HV | 12705_R | 10873_N | 12612_J | 2758_I/2'6 | 10400_M | hg |
|---------|-----------|----------|-----------|---------|---------|--------|--------|---------|---------|-----------------|----------|--------|--------|----------|--------|---------|--------|----------|---------|---------|---------|------------|---------|----|
| rCRS    |           | c        | G         | t       | A       | T      | G      | t       | G       | c               | A        | c      | tc     | T        | tc     | T       | tc     | G        | tc      | a       | a       | G          | tc      | H  |
| Sample  | Extract # |          |           |         |         |        |        |         |         |                 |          |        |        |          |        |         |        |          |         |         |         |            |         |    |
| aUz     |           |          |           |         |         |        |        |         |         |                 |          |        |        |          |        |         |        |          |         |         |         |            |         |    |
| UZOO-43 | 1         | C        | G         | T       | G       | T      | G      | T       | G       | T               | A        | C      | G      | T        | A      | T       | G      | A        | G       | A       | A       | G          | G       | U  |
|         | 2         | C        | G         | T       | G       | T      | G      | T       | G       | T               | A        | C      | G      | T        | A      | T       | G      | A        | G       | A       | A       | G          | G       | U  |
| UZOO-46 | 1         | C        | G         | T       | G       | T      | G      | T       | G       | T               | A        | C      | G      | T        | A      | T       | G      | A        | G       | A       | A       | G          | G       | U  |
|         | 2         | C        | G         | T       | G       | T      | G      | T       | G       | T               | A        | C      | G      | T        | g/a    | T       | G      | A        | G       |         | A       | G          | G       | U  |
| UZOO-16 | 1         | C        | G         | T       | G       | T      | G      | T       | G       | T               | A        | C      | G      | T        | A      | T       | G      | A        | G       | A       | A       | G          | G       | U  |
|         | 2         | C        | G         | T       | G       | T      | G      | T       | G       | T               | A        | C      | G      | T        | g/a    | T       | G      | A        | G       | A       | A       | G          | G       | U  |
| UZOO-40 | 1         | C        | G         | T       | G       | T      | G      | T       | G       | T               | A        | C      | G      | T        | A      | T       | G      | A        | G       | A       | A       | G          | G       | U  |
|         | 2         | C        | G         | T       | G       | T      | G      | T       | G       | T               | A        | C      | G      | T        | A      | T       | G      | A        | G       | A       | A       | G          | G       | U  |
| UZOO-70 | 1         | C        | G         | T       | G       | T      | G      | T       | G       | T               | A        | C      | G      | T        | A      | T       | G      | A        | G       | A       | A       | G          | G       | U  |
|         | 2         | C        | G         | T       | G       | T      | g/a    | T       | G       | T               | A        | C      | G      | T        | A      | T       | G      | A        | G       | A       | A       | G          | G       | U  |
| UZOO-77 | 1         | C        | G         | T       | A       | T      | G      | T       | G       | C               | A        | C      | G      | T        | G      | T       | G      | G        | G       | A       | A       | G          | G       | H  |
| UZOO-7  | 1         | C        |           | T       | A       | T      | G      | C       | G       | T               | A        | C      | G      | T        | A      | T       | G      |          |         | G       | A       | G          | A       | C  |
|         | 2         | C        | G         | T       | A       | T      | g/a    | C       | G       | T               | A        | C      | G      | T        | A      | T       | G      |          | A       | G       | A       | G          | A       | C  |
| UZOO-8  | 1         | C        | G         | T       | A       | T      | G      | C       | G       | T               | A        | C      | G      | T        | A      | T       | G      | A        | A       | G       | A       | G          | A       | C  |
|         | 2         | C        | G         | T       |         | T      | g/a    | C       | G       | T               | A        |        | G      | T        | g/a    | T       | G      |          |         | G       | A       | G          |         | C  |
| UZOO-74 | 1         | C        | G         | T       | A       | T      | G      | C       | G       | T               | A        | C      | G      | T        | A      | T       | G      |          | A       | G       | A       | G          | A       | C  |
|         | 2         | C        | G         | T       | A       | T      | G      | C       | G       | T               | A        | C      | G      | T        | A      | T       | G      |          | A       | G       | A       | G          | A       | C  |

SNPs typed on the L-strand are reported in capital letters in the reference rCRS profile, whereas SNPs typed on the H-strand are reported in small letters. Missing data signifies allelic dropout or fluorescence signal below the background threshold (100 relative fluorescent units, rfu). ‘g/a’ indicates the presence of a mixed signal for the position interrogated. A mixed signal was repeatedly obtained at position 8994 (haplogroup W) with the detection of an additional G base. However, the rest of the profile never could support phylogenetically the presence of the G base at this particular position. For each individual, profiles were obtained from two independent extracts, except for individual BOO72-9 for which a second samples was not available and for UZOO-77, BOO57-1, BOO72-10, BOO72-4, BOO72-7, BOO72-15, and BOO72-1, for which the second individual was extracted in an independent laboratory.

rCRS, revised Cambridge Reference Sequence; hg, haplogroup.

|             |   | 13928_R9 | 3594_L3'4 | 10550_K | 11467_U | 4248_A | 8994_W | 13263_C | 13368_T | 11719_preHV_R0 | 8280delB | 4580_V | 6371_X | 10238_N1 | 7028_H | 10034_I | 5178_D | 14766_HV | 12705_R | 10873_N | 12612_J | 2758_L2'6 | 10400_M | hg |
|-------------|---|----------|-----------|---------|---------|--------|--------|---------|---------|----------------|----------|--------|--------|----------|--------|---------|--------|----------|---------|---------|---------|-----------|---------|----|
| <b>aPo</b>  |   |          |           |         |         |        |        |         |         |                |          |        |        |          |        |         |        |          |         |         |         |           |         |    |
| Po4         | 1 | C        | G         | T       | G       | T      | g/a    |         | G       | T              | A        |        | G      | T        | A      | T       | G      |          | G       |         | A       | G         |         | U  |
|             | 2 | C        | G         | T       | G       | T      | g/a    | T       | G       | T              | A        |        | G      | T        | A      | T       | G      |          |         |         | A       | G         | G       | U  |
| Po2         | 1 | C        | G         | T       | G       | T      | G/a    | T       | G       | T              | A        | C      | G      | T        | A      | T       | G      | A        | G       | A       | A       | G         | G       | U  |
|             | 2 | C        | G         | T       | G       | T      | g/a    | T       | G       | T              | A        |        | G      | T        | A      | T       | G      |          | G       | A       | A       | G         | G       | U  |
| <b>aBOO</b> |   |          |           |         |         |        |        |         |         |                |          |        |        |          |        |         |        |          |         |         |         |           |         |    |
| BOO49-3     | 1 | C        | G         | T       | G       | T      | G      | T       | G       | T              | A        | C      | G      | T        | A      | T       | G      | A        | G       | A       | A       | G         | G       | U  |
|             | 2 | C        | G         | T       | G       | T      | G      | T       | G       | T              | A        | C      | G      | T        | A      | T       | G      | A        | G       | A       | A       | G         | G       | U  |
| BOO57-1     | 1 | C        | G         | T       | G       | T      | G      | T       | G       | T              | A        | C      | G      | T        | A      | T       | G      | A        | G       | A       | A       | G         | G       | U  |
| BOO49-1     | 1 | C        | G         | T       | G       | T      | G      | T       | G       | T              | A        | C      | G      | T        | A      | T       | G      | A        | G       | A       | A       | G         | G       | U  |
|             | 2 | C        | G         | T       | G       | T      | G      | T       | G       | T              | A        | C      | G      | T        | A      | T       | G      | A        | G       | A       | A       | G         | G       | U  |
| BOO72-11    | 1 | C        | G         | T       | G       | T      | G      | T       | G       | T              | A        | C      | G      | T        | A      | T       | G      | A        | G       | A       | A       | G         | G       | U  |
|             | 2 | C        | G         | T       | G       | T      | G      | T       | G       | T              | A        | C      | G      | T        | A      | T       | G      | A        | G       | A       | A       | G         | G       | U  |
| BOO72-9     | 1 | C        | G         | T       | G       | T      | G      | T       | G       | T              | A        | C      | G      | T        | A      | T       | G      | A        | G       | A       | A       | G         | G       | U  |
| BOO72-10    | 1 | C        | G         | T       | G       | T      | G      | T       | G       | T              | A        | C      | G      | T        | A      | T       | G      | A        | G       | A       | A       | G         | G       | U  |
| BOO72-14    | 1 | C        | G         | T       | G       | T      | G      | T       | G       | T              | A        | C      | G      | T        | A      | T       | G      | A        | G       | A       | A       | G         | G       | U  |
|             | 2 | C        | G         | T       | G       | T      | G      | T       | G       | T              | A        | C      | G      | T        | A      | T       | G      | A        | G       | A       | A       | G         | G       | U  |
| BOO72-8     | 1 | C        | G         | T       | G       | T      | G      | T       | G       | T              | A        | C      | G      | T        | A      | T       | G      | A        | G       | A       | A       | G         | G       | U  |
|             | 2 | C        | G         | T       | G       | T      | G      | T       | G       | T              | A        | C      | G      | T        | A      | T       | G      | A        | G       | A       | A       | G         | G       | U  |
| BOO72-4     | 1 | C        | G         | T       | A       | T      | G      | T       | A       | T              | A        | C      | G      | T        | A      | T       | G      | A        | G       | A       | A       | G         | G       | T  |
| BOO49-2     | 1 | C        | G         | T       | A       | T      | G      | C       | G       | T              | A        |        | G      | T        | A      | T       | G      |          |         | G       | A       | G         |         | C  |
|             | 2 | C        | G         | T       | A       | T      | G      | C       | G       | T              | A        | C      | G      | T        | A      | T       | G      |          |         | G       |         | G         |         | C  |
| BOO49-4     | 1 | C        | G         | T       | A       | T      | G      | C       | G       | T              | A        | C      | G      | T        | A      | T       | G      | A        | A       | G       | A       | G         | A       | C  |
|             | 2 | C        | G         | T       | A       | T      | G      | C       | G       | T              | A        |        | G      | T        | A      | T       | G      |          |         | G       |         | G         | A       | C  |
| BOO57-3     | 1 | C        | G         | T       | A       | T      | G      | C       | G       | T              | A        | C      | G      | T        | A      | T       | G      |          | A       | G       | A       | G         | A       | C  |
|             | 2 | C        | G         | T       | A       | T      | G      | C       | G       | T              | A        | C      | G      | T        | A      | T       | G      | A        | A       | G       | A       | G         | A       | C  |
| BOO72-2     | 1 | C        | G         | T       | A       | T      | G      | C       | G       | T              | A        | C      | G      | T        | A      | T       | G      | A        | A       | G       | A       | G         | A       | C  |
|             | 2 | C        | G         | T       | A       | T      | G      | C       | G       | T              | A        | C      | G      | T        | A      | T       | G      | A        | A       | G       | A       | G         | A       | C  |
| BOO72-7     | 1 | C        | G         | T       | A       | T      | G      | C       | G       | T              | A        |        | G      |          | A      | T       | G      |          |         | G       | A       | G         | A       | C  |
| BOO72-12    | 1 | C        | G         | T       | A       | T      | G      | C       | G       | T              | A        | C      | G      | T        | A      | T       | G      |          | A       | G       | A       | G         | A       | C  |
|             | 2 | C        | G         | T       | A       | T      | G      | C       | G       | T              | A        |        | G      | T        | A      | T       | G      |          | A       |         | A       | G         | A       | C  |
| BOO72-5     | 1 | C        | G         | T       | A       | T      | G      | C       | G       | T              | A        | C      | G      | T        | A      | T       | G      |          | A       | G       | A       | G         | A       | C  |
|             | 2 | C        | G         | T       | A       | T      | G      | C       | G       | T              | A        | C      | G      | T        | A      | T       | G      | A        | A       | G       | A       | G         | A       | C  |
| BOO72-6     | 1 | C        | G         | T       | A       | T      | G      | C       | G       | T              | A        | C      | G      | T        | A      | T       | G      | A        | A       | G       | A       | G         | A       | C  |
|             | 2 | C        | G         | T       | A       | T      | G      | C       | G       | T              | A        | C      | G      | T        | A      | T       | G      |          | A       | G       | A       | G         | A       | C  |
| BOO49-6     | 1 | C        | G         | T       | A       | T      | G      | T       | G       | T              | A        | C      | G      | T        | A      | T       | T      | A        | A       | G       | A       | G         | A       | D  |
|             | 2 |          | G         | T       | A       | T      | G      | T       | G       | T              | A        | C      | G      | T        | A      | T       | T      | A        |         | G       | A       | G         |         | D  |
| BOO72-13    | 1 | C        | G         | T       | A       | T      | G      | T       | G       | T              | A        | C      | G      | T        | A      | T       | T      | A        | A       | G       | A       | G         | A       | D  |
|             | 2 | C        | G         | T       | A       | T      | G      | T       | G       | T              | A        | C      | G      | T        | A      | T       | T      | A        | A       | G       | A       | G         | A       | D  |
| BOO72-15    | 1 | C        | G         | T       | A       | T      | G      | T       | G       | T              | A        | C      | G      | T        | A      | T       | T      | A        | A       | G       | A       | G         | A       | D  |
| BOO49-5     | 1 |          | G         | T       | A       | T      | G      | T       | G       | T              | A        | C      | G      | T        | A      | T       | G      |          | A       | G       | A       | G         | A       | M  |
|             | 2 | C        | G         | T       | A       | T      | G      | T       | G       | T              | A        |        | G      | T        | A      | T       | G      | A        | A       | G       | A       | G         | A       | M  |
| BOO72-3     | 1 | C        | G         | T       | A       | T      | G      | T       | G       | T              | A        | C      | G      | T        | A      | T       | G      |          |         | G       | A       | G         | A       | M  |
|             | 2 | C        | G         | T       | A       | T      | G      | T       | G       | T              | A        | C      | G      | T        | A      | T       | G      | A        | A       | G       | A       | G         | A       | M  |
| BOO72-1     | 1 | C        | G         | T       | A       | T      | G      | T       | G       | T              | A        |        | G      | T        | A      | T       | G      |          |         | G       | A       | G         | A       | M  |

SNPs typed on the L-strand are reported in capital letters in the reference rCRS profile, whereas SNPs typed on the H-strand are reported in small letters. Missing data signifies allelic dropout or fluorescence signal below the background threshold (100 relative fluorescent units, rfu). 'g/a' indicates the presence of a mixed signal for the position interrogated. A mixed signal was repeatedly obtained at position 8994 (haplogroup W) with the detection of an additional G base. However, the rest of the profile never could support phylogenetically the presence of the G base at this particular position. For each individual, profiles were obtained from two independent extracts, except for individual BOO72-9 for which a second samples was not available and for UZOO-77, BOO57-1, BOO72-10, BOO72-4, BOO72-7, BOO72-15, and BOO72-1, for which the second individual was extracted in an independent laboratory. rCRS, revised Cambridge Reference Sequence; hg, haplogroup.
