# Supplementary material for: Ancient DNA Reveals Prehistoric Gene-Flow from Siberia in the Complex Human Population History of North East Europe
Source: PubMed Central journal article supplement (PMC3573127; doi:10.1371/journal.pgen.1003296), 2013-02-14
Supplement: pgen.1003296.s007.pdf [file pgen.1003296.s007.pdf]

**Table S4. Results of quantitative PCR.**

| <b>PCR:</b> | <b>L16209/H16303</b> |                             |                   |              |                          |                  |
|-------------|----------------------|-----------------------------|-------------------|--------------|--------------------------|------------------|
| <b>Site</b> | <b>Sample</b>        | <b>Cycle Threshold (Ct)</b> | <b>Average Ct</b> | <b>Stdev</b> | <b>Stdev/AverageCt %</b> | <b>Copies/uL</b> |
| aUz         | UZOO43               | 38.87                       | 38.94             | 0.08         | 0.20                     | 1 158            |
| aUz         | UZOO43               | 39.02                       |                   |              |                          |                  |
| aUz         | UZOO43               | 38.92                       |                   |              |                          |                  |
| aUz         | UZOO74               | 42.32                       | 42.03             | 0.51         | 1.22                     | 160              |
| aUz         | UZOO74               | 41.44                       |                   |              |                          |                  |
| aUz         | UZOO74               | 42.33                       |                   |              |                          |                  |
| aBOO        | BOO72-1              | 33.88                       | 33.95             | 0.18         | 0.53                     | 28 117           |
| aBOO        | BOO72-1              | 34.16                       |                   |              |                          |                  |
| aBOO        | BOO72-1              | 33.82                       |                   |              |                          |                  |
| aBOO        | BOO79-9              | 37.38                       | 36.65             | 2.12         | 5.79                     | 5 004            |
| aBOO        | BOO79-9              | 38.31                       |                   |              |                          |                  |
| aBOO        | BOO79-9              | 34.26                       |                   |              |                          |                  |
| Site4       | sample1              | 33.70                       | 34.05             | 0.46         | 1.35                     | 26 430           |
| Site4       | sample1              | 33.88                       |                   |              |                          |                  |
| Site4       | sample1              | 34.57                       |                   |              |                          |                  |
| Site4       | sample2              | 33.79                       | 33.51             | 0.25         | 0.74                     | 37 424           |
| Site4       | sample2              | 33.34                       |                   |              |                          |                  |
| Site4       | sample2              | 33.39                       |                   |              |                          |                  |
| Site4       | sample3              | 34.43                       | 34.56             | 0.51         | 1.47                     | 19 069           |
| Site4       | sample3              | 35.12                       |                   |              |                          |                  |
| Site4       | sample3              | 34.13                       |                   |              |                          |                  |
| <b>PCR:</b> | <b>L16209/H16348</b> |                             |                   |              |                          |                  |
| <b>Site</b> | <b>Sample</b>        | <b>Cycle Threshold (Ct)</b> | <b>Average Ct</b> | <b>Stdev</b> | <b>Stdev/AverageCt %</b> | <b>Copies/uL</b> |
| aUz         | UZOO43               | 34.54                       | 34.69             | 0.15         | 0.43                     | 6                |
| aUz         | UZOO43               | 34.68                       |                   |              |                          |                  |
| aUz         | UZOO43               | 34.84                       |                   |              |                          |                  |
| aUz         | UZOO74               | 35.30                       | 35.03             | 0.24         | 0.68                     | 5                |
| aUz         | UZOO74               | 34.84                       |                   |              |                          |                  |
| aUz         | UZOO74               | 34.96                       |                   |              |                          |                  |
| aBOO        | BOO72-1              | 31.11                       | 30.89             | 0.64         | 2.06                     | 70               |
| aBOO        | BOO72-1              | 30.17                       |                   |              |                          |                  |
| aBOO        | BOO72-1              | 31.38                       |                   |              |                          |                  |
| aBOO        | BOO79-9              | 30.42                       | 30.44             | 0.05         | 0.17                     | 88               |
| aBOO        | BOO79-9              | 30.50                       |                   |              |                          |                  |
| aBOO        | BOO79-9              | 30.40                       |                   |              |                          |                  |
| Site4       | sample1              | 31.76                       | 32.11             | 0.62         | 1.92                     | 31               |
| Site4       | sample1              | 31.74                       |                   |              |                          |                  |
| Site4       | sample1              | 32.82                       |                   |              |                          |                  |
| Site4       | sample2              | 30.05                       | 30.20             | 0.14         | 0.47                     | 103              |
| Site4       | sample2              | 30.33                       |                   |              |                          |                  |
| Site4       | sample2              | 30.21                       |                   |              |                          |                  |
| Site4       | sample3              | 31.86                       | 31.76             | 0.57         | 1.78                     | 39               |
| Site4       | sample3              | 31.15                       |                   |              |                          |                  |
| Site4       | sample3              | 32.27                       |                   |              |                          |                  |
