# Supplementary material for: Ancient DNA Reveals Prehistoric Gene-Flow from Siberia in the Complex Human Population History of North East Europe
Source: PubMed Central journal article supplement (PMC3573127; doi:10.1371/journal.pgen.1003296), 2013-02-14
Supplement: pgen.1003296.s008.pdf [file pgen.1003296.s008.pdf]

**Table S5. Details of ancient and modern-day populations used in comparative analyses.**

| <b>MODERN-DAY POPULATIONS</b> |              |          |                       |                      |
|-------------------------------|--------------|----------|-----------------------|----------------------|
| <b>Population names</b>       | <b>label</b> | <b>N</b> | <b>References</b>     | <b>BayeSSC pools</b> |
| Albanians                     | ALB          | 281      | [1,2,3]               |                      |
| Aleuts                        | ale          | 199      | [4]                   |                      |
| Kizhi                         | alt          | 90       | [5]                   |                      |
| Armenians                     | ARM          | 192      | [6]                   |                      |
| Aromuns                       | aro          | 133      | [2]                   |                      |
| Austrians                     | AUT          | 117      | [7,8]                 |                      |
| Azeris                        | AZE          | 88       | [9,10]                |                      |
| Bashkirs                      | BA           | 207      | [11]                  |                      |
| Byelorussians                 | BEL          | 352      | [3,12]                |                      |
| Bulgarians                    | BGR          | 141      | [9,13]                |                      |
| Bosnians                      | BIH          | 322      | [14,15]               |                      |
| Buryats                       | BU           | 411      | [5,16,17]             |                      |
| Swiss                         | CHE          | 230      | [18,19]               |                      |
| Chukchi                       | CHU          | 262      | [4,17,20]             |                      |
| Chuvash                       | CU           | 92       | [9,11]                |                      |
| Cyprus                        | CYP          | 91       | [21]                  |                      |
| Czech                         | CZE          | 449      | [3,9,22,23]           | CE                   |
| Germans                       | DEU          | 1406     | [24,25,26,27,28]      | CE                   |
| Eskimo                        | esk          | 825      | [4,20,29,30,31]       |                      |
| Spanish                       | ESP          | 704      | [32,33,34,35,36,37]   |                      |
| Estonians                     | EST          | 662      | [3,18,39,39,40]       | NEE                  |
| Evenks                        | eve          | 407      | [5,16,17,41,42]       |                      |
| Finns                         | FIN          | 508      | [43,44,45]            | NEE                  |
| French                        | FRA          | 998      | [46,47]               |                      |
| British                       | GBR          | 2418     | [9,24,48,49,50]       |                      |
| Georgians                     | GEO          | 158      | [3,10]                |                      |
| Greeks                        | GRC          | 656      | [2,3,9,21]            |                      |
| Croatians                     | HRV          | 980      | [3,51]                |                      |
| Hungarians                    | HUN          | 190      | [3,52]                |                      |
| Irish                         | IRL          | 300      | [52,53]               |                      |
| Iranians                      | IRN          | 517      | [10,54]               |                      |
| Iraq                          | IRQ          | 168      | [9,55]                |                      |
| Iraqi                         | ISL          | 448      | [24,38,56]            |                      |
| Sardinians                    | IT-88        | 115      | [9]                   |                      |
| Italians                      | ITA          | 936      | [9,57,58,59,60,61,62] |                      |
| Jordanians                    | JOR          | 146      | [63]                  |                      |
| Kabardians                    | kab          | 163      | [3,9]                 |                      |
| Kets                          | ket          | 104      | [3,64]                |                      |
| Khamnigans                    | kham         | 99       | [17]                  |                      |
| Khants                        | khan         | 318      | [3,65]                |                      |

|                 |       |     |                     |     |
|-----------------|-------|-----|---------------------|-----|
| Khakassians     | KK    | 110 | [5,16,17]           |     |
| Komi            | KO    | 127 | [11]                |     |
| Koryaks         | kor   | 147 | [66]                |     |
| Karelians       | KR    | 305 | [40]                | NEE |
| Kurds           | kur   | 73  | [9,10]              |     |
| Lithuanians     | LTU   | 180 | [3]                 | NEE |
| Latvians        | LVA   | 413 | [40,67]             | NEE |
| Mansi           | man   | 161 | [64,65]             |     |
| Mari            | ME    | 136 | [11]                |     |
| Mongolians      | MNG   | 262 | [17,68,69,70]       |     |
| Mordvinians     | MO    | 99  | [11]                |     |
| Nenets Asian    | NEN_A | 79  | [3]                 |     |
| Nenets European | NEN_E | 128 | [29,71]             |     |
| Nganasans       | nga   | 118 | [4,64,72]           |     |
| Nivkhs          | niv   | 113 | [5,41]              |     |
| Nogays          | nog   | 206 | [73]                |     |
| Norwegians      | NOR   | 663 | [9,49,74,75,76]     |     |
| Poles           | POL   | 583 | [3,9,77]            | CE  |
| Portuguese      | PRT   | 848 | [37,78]             |     |
| Palestinians    | PSE   | 117 | [9]                 |     |
| Romanians       | ROU   | 197 | [2,9]               |     |
| Yakuts          | SA    | 770 | [3,16,17,79,80,81]  |     |
| Saami           | saa   | 559 | [38,44,71,74,82,83] | saa |
| Saudi Arabians  | SAU   | 325 | [3,84]              |     |
| Ossets          | SE    | 289 | [3,9]               |     |
| Selkups         | sel   | 120 | [3]                 |     |
| Shors           | sho   | 82  | [17]                |     |
| Slovaks         | SVK   | 510 | [85]                |     |
| Slovenians      | SVN   | 233 | [77,86]             |     |
| Swedes          | SWE   | 646 | [3]                 |     |
| Syrians         | SYR   | 169 | [3,9]               |     |
| Tatars          | TA    | 225 | [11]                |     |
| Telenghits      | tel   | 71  | [17]                |     |
| Tofalars        | tof   | 104 | [5,16]              |     |
| Tubalars        | tub   | 72  | [17]                |     |
| Turks           | TUR   | 608 | [3,9,10,13]         |     |
| Tuvinians       | tuv   | 645 | [3,5,16,17,42,71]   |     |
| Udmurts         | UD    | 109 | [11]                |     |
| Ukrainians      | UKR   | 610 | [3]                 |     |
| Ulchi           | ulc   | 166 | [5]                 |     |
| Yukagir         | yuk   | 153 | [4,42]              |     |

| <b>ANCIENT POPULATIONS</b>                                        |              |          |                   |                  |
|-------------------------------------------------------------------|--------------|----------|-------------------|------------------|
| <b>Population name</b>                                            | <b>label</b> | <b>N</b> | <b>References</b> | <b>Dates</b>     |
| Bol'shoy Oleni Ostrov individuals                                 | aBOO         | 23       | this study        | 3,500 uncal. yBP |
| Bol'shoy Oleni Ostrov individuals (non-redundant haplotypes)      | aBOO2        | 9        | this study        | 3,500 uncal. yBP |
| Confederated nomads of the Xiongnu                                | aEG          | 46       | [87]              | 2,200-2,300 yBP  |
| Central/East Europe hunter-gatherers                              | aHG          | 22       | [88,89]           | 4,250-30,000 yBP |
| Nomads from Kazakhstan                                            | aKAZ         | 25       | [90]              | 2,100-3,400 yBP  |
| Siberian Kurgans                                                  | aKUR         | 26       | [91]              | 1,600-3,800 yBP  |
| Central Germany Linear Pottery Culture Neolithic individuals      | aLBK         | 42       | [92]              | 7,000-7,500 yBP  |
| Lokomotiv Kitoi Neolithic individuals                             | aLOK         | 30       | [93]              | 6,130-7,140 yBP  |
| Popovo individuals                                                | aPo          | 2        | this study        | 7,000 uncal. yBP |
| Scandinavian Pitted-Ware Culture foragers                         | aPWC         | 19       | [94]              | 4,500-5,300 yBP  |
| Spanish Neolithic individuals                                     | aSP          | 11       | [95]              | 5,000-5,500 yBP  |
| Ust'Ida Neolithic population                                      | aUST         | 17       | [96]              | 4,000-5,800 yBP  |
| Yuzhnyy Oleni Ostrov individuals                                  | aUz          | 9        | this study        | 7,500 yBP        |
| Uzhnyi Oleni Ostrov/Popovo individuals                            | aUzPo        | 11       | this study        | 7,500 uncal. yBP |
| Uzhnyi Oleni Ostrov/Popovo individuals (non-redundant haplotypes) | aUzPo2       | 7        | this study        | 7,500 uncal. yBP |

BayeSSC, Bayesian SerialSimCoal; CEE, central Europeans ; NEE, North East Europeans; saa, Saami.

## References

1. Belledi M, Poloni ES, Casalotti R, Conterio F, Mikerezi I, et al. (2000) Maternal and paternal lineages in Albania and the genetic structure of Indo-European populations. *Eur J Hum Genet* 8: 480-486.
2. Bosch E, Calafell F, Gonzalez-Neira A, Flaiz C, Mateu E, et al. (2006) Paternal and maternal lineages in the Balkans show a homogeneous landscape over linguistic barriers, except for the isolated Aromuns. *Ann Hum Genet* 70: 459-487.
3. Balanovsky, personal communication
4. Volodko NV, Starikovskaya EB, Mazunin IO, Eltsov NP, Naidenko PV et al. (2008) Mitochondrial genome diversity in arctic Siberians, with particular reference to the evolutionary history of Beringia and Pleistocenic peopling of the Americas. *Am J Hum Genet* 82:1084-100.
5. Starikovskaya EB, Sukernik RI, Derbeneva OA, Volodko NV, Ruiz-Pesini E, et al. (2005) Mitochondrial DNA diversity in indigenous populations of the southern extent of Siberia, and the origins of Native American haplogroups. *Ann Hum Genet* 69: 67-89.
6. Metspalu et al., unpublished.

7. Handt O, Richards M, Trommsdorff M, Kilger C, Simanainen J, et al. (1994) Molecular genetic analyses of the Tyrolean Ice Man. *Science* 264: 1775-1778.
8. Parson W, Parsons TJ, Scheithauer R, Holland MM (1998) Population data for 101 Austrian Caucasian mitochondrial DNA d-loop sequences: application of mtDNA sequence analysis to a forensic case. *Int J Legal Med* 111: 124-132.
9. Richards M, Macaulay V, Hickey E, Vega E, Sykes B, et al. (2000) Tracing European founder lineages in the Near Eastern mtDNA pool. *Am J Hum Genet* 67: 1251-1276.
10. Quintana-Murci L, Chaix R, Wells RS, Behar DM, Sayar H, et al. (2004) Where west meets east: the complex mtDNA landscape of the southwest and Central Asian corridor. *Am J Hum Genet* 74: 827-845.
11. Bermisheva M, Tambets K, Villems R, Khusnutdinova E (2002) [Diversity of mitochondrial DNA haplotypes in ethnic populations of the Volga-Ural region of Russia]. *Mol Biol (Mosk)* 36: 990-1001.
12. Belyaeva O, Bermisheva M, Khrunin A, Slominsky P, Bebyakova N, et al. (2003) Mitochondrial DNA Variations in Russian and Belorussian. *Hum Biol* 75: 647-660.
13. Calafell F, Underhill P, Tolun A, Angelicheva D, Kalaydjieva L (1996) From Asia to Europe: mitochondrial DNA sequence variability in Bulgarians and Turks. *Ann Hum Genet* 60 ( Pt 1): 35-49.
14. Malyarchuk BA, Grzybowski T, Derenko MV, Czarny J, Drobniec K, et al. (2003) Mitochondrial DNA variability in Bosnians and Slovenians. *Ann Hum Genet* 67:412-25.
15. Harvey, Unpublished.
16. Derenko MV, Maliarchuk BA, Zakharov IA (2002) Origin of caucasoid-specific mitochondrial DNA lineages in the ethnic populations of the Altai-Sayan region. *Genetika* 38:1292-7.
17. Derenko M, Malyarchuk B, Grzybowski T, Denisova G, Dambueva I (2007) Phylogeographic analysis of mitochondrial DNA in northern Asian populations. *Am J Hum Genet* 81:1025-41.

18. Pult I, Sajantila A, Simanainen J, Georgiev O, Schaffner W, et al. (1994) Mitochondrial DNA sequences from Switzerland reveal striking homogeneity of European populations. *Biol Chem Hoppe Seyler* 375: 837-840.
19. Dimo-Simonin N, Grange F, Taroni F, Brandt-Casadevall C, Mangin P (2000) Forensic evaluation of mtDNA in a population from south west Switzerland. *Int J Legal Med* 113: 89-97.
20. Starikovskaya YB, Sukernik RI, Schurr TG, Kogelnik AM, Wallace DC (1998) mtDNA diversity in Chukchi and Siberian Eskimos: implications for the genetic history of Ancient Beringia and the peopling of the New World. *Am J Hum Genet* 63:1473-91.
21. Irwin J, Saunier J, Strouss K, Paintner C, Diegoli T, et al. (2008) Mitochondrial control region sequences from northern Greece and Greek Cypriots. *Int J Legal Med* 122: 87-89.
22. Vanecek T, Vorel F, Sip M (2004) Mitochondrial DNA D-loop hypervariable regions: Czech population data. *Int J Legal Med* 118: 14-18.
23. Malyarchuk BA, Vanecek T, Perkova MA, Derenko MV, Sip M (2006) Mitochondrial DNA variability in the Czech population, with application to the ethnic history of Slavs. *Hum Biol* 78: 681-696.
24. Richards M, Corte-Real H, Forster P, Macaulay V, Wilkinson-Herbots H, et al. (1996) Paleolithic and neolithic lineages in the European mitochondrial gene pool. *Am J Hum Genet* 59: 185-203.
25. Baasner A, Schafer C, Junge A, Madea B (1998) Polymorphic sites in human mitochondrial DNA control region sequences: population data and maternal inheritance. *Forensic Sci Int* 98: 169-178.
26. Lutz S, Weisser HJ, Heizmann J, Pollak S (1998) Location and frequency of polymorphic positions in the mtDNA control region of individuals from Germany. *Int J Legal Med* 111: 67-77.
27. Pfeiffer H, Brinkmann B, Huhne J, Rolf B, Morris AA, et al. (1999) Expanding the forensic German mitochondrial DNA control region database: genetic diversity as a function of sample size and microgeography. *Int J Legal Med* 112: 291-298..
28. Poetsch M, Wittig H, Krause D, Lignitz E (2003) Mitochondrial diversity of a northeast German population sample. *Forensic Sci Int* 137: 125-132.

29. Saillard J, Forster P, Lynnerup N, Bandelt HJ, Nørby S (2000) mtDNA variation among Greenland Eskimos: the edge of the Beringian expansion. *Am J Hum Genet* 67:718-26.
30. Helgason A, Pálsson G, Pedersen HS, Angulalik E, Gunnarsdóttir ED, et al. (2006) mtDNA variation in Inuit populations of Greenland and Canada: migration history and population structure. *Am J Phys Anthropol* 130:123-34.
31. Simonson et al., unpublished.
32. Corte-Real HB, Macaulay VA, Richards MB, Hariti G, Issad MS, et al. (1996) Genetic diversity in the Iberian Peninsula determined from mitochondrial sequence analysis. *Ann Hum Genet* 60: 331-350.
33. Salas A, Comas D, Lareu MV, Bertranpetit J, Carracedo A (1998) mtDNA analysis of the Galician population: a genetic edge of European variation. *Eur J Hum Genet* 6: 365-375.
34. Crespillo M, Luque JA, Paredes M, Fernandez R, Ramirez E, et al. (2000) Mitochondrial DNA sequences for 118 individuals from northeastern Spain. *Int J Legal Med* 114: 130-132.
35. Larruga JM, Diez F, Pinto FM, Flores C, Gonzalez AM (2001) Mitochondrial DNA characterisation of European isolates: the Maragatos from Spain. *Eur J Hum Genet* 9: 708-716.
36. Maca-Meyer N, Sanchez-Velasco P, Flores C, Larruga JM, Gonzalez AM, et al. (2003) Y chromosome and mitochondrial DNA characterization of Pasiegos, a human isolate from Cantabria (Spain). *Ann Hum Genet* 67: 329-339.
37. Gonzalez AM, Karadsheh N, Maca-Meyer N, Flores C, Cabrera VM, et al. (2008) Mitochondrial DNA variation in Jordanians and their genetic relationship to other Middle East populations. *Ann Hum Biol* 35: 212-231.
38. Sajantila A, Lahermo P, Anttinen T, Lukka M, Sistonen P, et al. (1995) Genes and languages in Europe: an analysis of mitochondrial lineages. *Genome Res* 5: 42-52.
39. Sajantila A, Salem AH, Savolainen P, Bauer K, Gierig C, et al. (1996) Paternal and maternal DNA lineages reveal a bottleneck in the founding of the Finnish population. *Proc Natl Acad Sci U S A* 93:12035-9.

40. Lappalainen T, Laitinen V, Salmela E, Andersen P, Huoponen K (2008) Migration waves to the Baltic Sea region. *Ann Hum Genet* 72, 337-348.
41. Tajima A, Hayami M, Tokunaga K, Juji T, Matsuo M, et al. (2004) Genetic origins of the Ainu inferred from combined DNA analyses of maternal and paternal lineages. *J Hum Genet* 49:187-93.
42. Pakendorf B, Novgorodov IN, Osakovskij VL, Danilova AP, Protod'jakonov AP, et al. (2006) Investigating the effects of prehistoric migrations in Siberia: genetic variation and the origins of Yakuts. *Hum Genet* 120: 33.
43. Lahermo P, Sajantila A, Sistonen P, Lukka M, Aula P, et al. (1996) The genetic relationship between the Finns and the Finnish Saami (Lapps): analysis of nuclear DNA and mtDNA. *Am J Hum Genet* 58: 1309-1322.
44. Kittles RA, Bergen AW, Urbanek M, Virkkunen M, Linnoila M, et al. (1999) Autosomal, mitochondrial, and Y chromosome DNA variation in Finland: evidence for a male-specific bottleneck. *Am J Phys Anthropol* 108: 381-399.
45. Meiniola M, Finnila S, Majamaa K (2001) Evidence for mtDNA admixture between the Finns and the Saami. *Hum Hered* 52: 160-170.
46. Dubut V, Chollet L, Murail P, Cartault F, Beraud-Colomb E, et al. (2004) mtDNA polymorphisms in five French groups: importance of regional sampling. *Eur J Hum Genet* 12: 293-300.
47. Richard C, Pennarun E, Kivisild T, Tambets K, Tolk HV, et al. (2007) An mtDNA perspective of French genetic variation. *Ann Hum Biol* 34: 68-79.
48. Piercy R, Sullivan KM, Benson N, Gill P (1993) The application of mitochondrial DNA typing to the study of white Caucasian genetic identification. *Int J Legal Med* 106:85-90.
49. Helgason A, Hickey E, Goodacre S, Bosnes V, Stefansson K, et al. (2001) mtDNA and the Islands of the North Atlantic: Estimating the Proportions of Norse and Gaelic Ancestry. *Am J Hum Genet* 68: 723-737.
50. Sykes B (2006) *Blood of the Isles: Exploring the Genetic Roots of Our Tribal History*: Bantam. 306 p.

51. Babalini C, Martinez-Labarga C, Tolk HV, Kivisild T, Giampaolo R, et al. (2005) The population history of the Croatian linguistic minority of Molise (southern Italy): a maternal view. *Eur J Hum Genet* 13: 902-912.
52. Bogácsi-Szabó E, Kalmár T, Csányi B, Tömöry G, Czibula A, et al. (2005) Mitochondrial DNA of ancient Cumanians: culturally Asian steppe nomadic immigrants with substantially more western Eurasian mitochondrial DNA lineages. *Hum Biol* 77:639-62.
53. McEvoy B, Richards M, Forster P, Bradley DG (2004) The Longue Duree of genetic ancestry: multiple genetic marker systems and Celtic origins on the Atlantic facade of Europe. *Am J Hum Genet* 75: 693-702.
54. Metspalu M, Kivisild T, Metspalu E, Parik J, Hudjashov G, et al. (2004) Most of the extant mtDNA boundaries in South and Southwest Asia were likely shaped during the initial settlement of Eurasia by anatomically modern humans. *BMC Genetics* 5: 26. doi:10.1186/1471-2156-5-26
55. Al-Zahery N, Semino O, Benuzzi G, Magri C, Passarino G, et al. (2003) Y-chromosome and mtDNA polymorphisms in Iraq, a crossroad of the early human dispersal and of post-Neolithic migrations. *Mol Phylogenet Evol* 28: 458-472.
56. Helgason A, Sigurdardottir S, Gulcher JR, Stefansson K, Ward R, et al. (2000) Sampling Saturation and the European MtDNA Pool: Implications for Detecting Genetic Relationships among Populations. *Archaeogenetics: DNA and the population prehistory of Europe*. Cambridge: McDonald Institute for Archaeological Research. pp. 285-294.
57. Francalacci P, Bertranpetit J, Calafell F, Underhill PA (1996) Sequence diversity of the control region of mitochondrial DNA in Tuscany and its implications for the peopling of Europe. *Am J Phys Anthropol* 100: 443-460.
58. Cali F, Le Roux MG, D'Anna R, Flugy A, De Leo G, et al. (2001) MtDNA control region and RFLP data for Sicily and France. *Int J Legal Med* 114: 229-231.
59. Mogentale-Profizi N, Chollet L, Stevanovitch A, Dubut V, Poggi C, et al. (2001) Mitochondrial DNA sequence diversity in two groups of Italian Veneto speakers from Veneto. *Ann Hum Genet* 65: 153-166.



60. Tagliabracci A, Turchi C, Buscemi L, Sassaroli C (2001) Polymorphism of the mitochondrial DNA control region in Italians. *Int J Legal Med* 114: 224-228.
61. Achilli A, Olivieri A, Pala M, Metspalu E, Fornarino S, et al. (2007) Mitochondrial DNA variation of modern Tuscans supports the near eastern origin of Etruscans. *Am J Hum Genet* 80: 759-768.
62. Varesi et al., unpublished.
63. Cabrera et al., unpublished.
64. Derbeneva OA, Starikovskaia EB, Volod'ko NV, Wallace DC, Sukernik RI (2002) Mitochondrial DNA variation in Kets and Nganasans and the early peoples of Northern Eurasia. *Genetika* 38:1554-60.
65. Pimenoff VN, Comas D, Palo JU, Vershubsky G, Kozlov A, et al. (2008) Northwest Siberian Khanty and Mansi in the junction of West and East Eurasian gene pools as revealed by uniparental markers. *Eur J Hum Genet* 16:1254-64.
66. Schurr TG, Sukernik RI, Starikovskaya YB, Wallace DC (1999) Mitochondrial DNA variation in Koryaks and Itel'men: population replacement in the Okhotsk Sea-Bering Sea region during the Neolithic. *Am J Phys Anthropol* 108:1-39.
67. Pliss L, Tambets K, Loogvali EL, Pronina N, Lazdins M, et al. (2006) Mitochondrial DNA portrait of Latvians: towards the understanding of the genetic structure of Baltic-speaking populations. *Ann Hum Genet* 70: 439-458.
68. Kolman CJ, Sambuughin N, Bermingham E (1996) Mitochondrial DNA analysis of Mongolian populations and implications for the origin of New World founders. *Genetics* 142:1321-34.
69. Kong QP, Yao YG, Sun C, Bandelt H J, Zhu CL, Zhang YP (2003) Phylogeny of East Asian mitochondrial DNA lineages inferred from complete sequences. *Am J Hum Genet* 73: 671–676.
70. Yao YG, Kong QP, Wang CY, Zhu CL, Zhang YP (2004) Different matrilineal contributions to genetic structure of ethnic groups in the silk road region in china. *Mol Biol Evol* 21:2265-80.
71. Tonks et al., unpublished.
72. Osipova et al., unpublished.

73. Bermisheva MA, Kutuev IA, Spitsyn VA, Villems R, Batyrova AZ, et al. (2005) Analysis of mitochondrial DNA variation in the population of Oroks. *Genetika* 41:78-84.
74. Dupuy BM, Olaisen B (1996) mtDNA sequences in the Norwegian Saami and main populations. In: Carracedo A, Brinkmann B, Bär W, editors. *Advances in forensic haemogenetics*. Berlin: Springer. pp. 23-25.
75. Opdal SH, Rognum TO, Vege A, Stave AK, Dupuy BM, et al. (1998) Increased number of substitutions in the D-loop of mitochondrial DNA in the sudden infant death syndrome. *Acta Paediatr* 87: 1039-1044.
76. Passarino G, Cavalleri GL, Lin AA, Cavalli-Sforza LL, Borresen-Dale AL, et al. (2002) Different genetic components in the Norwegian population revealed by the analysis of mtDNA and Y chromosome polymorphisms. *Eur J Hum Genet* 10: 521-529.
77. Malyarchuk BA, Grzybowski T, Derenko MV, Czarny J, Wozniak M, et al. (2002) Mitochondrial DNA variability in Poles and Russians. *Ann Hum Genet* 66: 261-283.
78. Pereira L, Cunha C, Amorim A (2004) Predicting sampling saturation of mtDNA haplotypes: an application to an enlarged Portuguese database. *Int J Legal Med* 118: 132-136.
79. Fedorova SA, Bermisheva MA, Villems R, Maksimova NR, Khusnutdinova EK (2003) Analysis of mitochondrial DNA haplotypes in yakut population. *Mol Biol* 37:643-53.
80. Pakendorf B, Wiebe V, Tarskaia LA, Spitsyn VA, Soodyall H, et al. (2003) Mitochondrial DNA evidence for admixed origins of central Siberian populations. *Am J Phys Anthropol* 120:211-24.
81. Zlojutro M, Rubicz R, Devor EJ, Spitsyn VA, Makarov SV, et al. (2006) Genetic structure of the Aleuts and Circumpolar populations based on mitochondrial DNA sequences: a synthesis. *Am J Phys Anthropol* 129:446-64.
82. Delghandi M, Utsi E, Krauss S (1998) Saami mitochondrial DNA reveals deep maternal lineage clusters. *Hum Hered* 48:108-14.
83. Tambets K, Rootsi S, Kivisild T, Help H, Serk P, et al. (2004) The Western and Eastern roots of the Saami--the story of genetic "outliers" told by mitochondrial DNA and Y chromosomes. *Am J Hum Genet* 74: 661-682.

84. Abu-Amero KK, Larruga JM, Cabrera VM, Gonzalez AM (2008) Mitochondrial DNA structure in the Arabian Peninsula. *BMC Evol Biol* 8: 45.
85. Koledova et al., unpublished.
86. Zupanic Pajnic I, Balazic J, Komel R (2004) Sequence polymorphism of the mitochondrial DNA control region in the Slovenian population. *Int J Legal Med* 118:1-4.
87. Keyser-Tracqui C, Crubézy E, Ludes B (2003) Nuclear and mitochondrial DNA analysis of a 2,000-year-old necropolis in the Egyin Gol Valley of Mongolia. *Am J Hum Genet* 73:247-260.
88. Bramanti B, Thomas M, Haak W, Unterlaender M, Jores P, et al. (2009) Genetic discontinuity between local hunter-gatherers and central Europe's first farmers. *Science* 326:137-140.
89. Krause J, Briggs A, Kircher M, Maricic T, Zwyns N, et al. (2010) A complete mtDNA genome of an early modern human from Kostenki, Russia. *Curr Biol* 20:231-236.
90. Lalueza-Fox C, Sampietro M, Gilbert M, Castri L, Facchini F, et al. (2004) Unravelling migrations in the steppe: mitochondrial DNA sequences from ancient central Asians. *Proc Biol Sci* 271:941-947.
91. Keyser C, Bouakaze C, Crubézy E, Nikolaev V, Montagnon D, et al. (2009) Ancient DNA provides new insights into the history of south Siberian Kurgan people. *Hum Genet* 126:395-410.
92. Haak W, Balanovsky O, Sanchez JJ, Koshel S, Zaporozhchenko V, et al. (2010) Ancient DNA from European early Neolithic farmers reveals their near eastern affinities. *PLoS Biol* 8 e1000536.
93. Mooder KP, Weber AW, Bamforth FJ, Lieverse AR, Schurr TG, et al. (2005) Matrilineal affinities and prehistoric Siberian mortuary practices: a case study from Neolithic Lake Baikal. *JAS* 32:619–634.
94. Malmström H, Gilbert M, Thomas M, Brandström M, Storå J, et al. (2009) Ancient DNA reveals lack of continuity between neolithic hunter-gatherers and contemporary Scandinavians. *Curr Biol* 19:1758-1762.
95. Sampietro M, Lao O, Caramelli D, Lari M, Pou R, et al. (2007) Palaeogenetic evidence supports a dual model of Neolithic spreading into Europe. *Proc Biol Sci* 274:2161-2167.

96. Mooder K, Schurr T, Bamforth F, Bazaliiski V, Savel'ev N (2006) Population affinities of Neolithic Siberians: a snapshot from prehistoric Lake Baikal. *Am J Phys Anthropol* 129:349-361.
