# Supplementary material for: Ancient DNA Reveals Prehistoric Gene-Flow from Siberia in the Complex Human Population History of North East Europe
Source: PLoS Genet. 2013 Feb 14;9(2):e1003296. doi: 10.1371/journal.pgen.1003296 (PMC3573127; doi:10.1371/journal.pgen.1003296)
Supplement: Table S2 — Grave and museum collection number for Yuzhnyy Oleni Ostrov, Popovo and Bol'shoy Oleni Ostrov specimens. (PDF) [file pgen.1003296.s005.pdf]

**Table S2. Grave and museum collection number for Yuzhnyy Oleni Ostrov, Popovo and Bol'shoy Oleni Ostrov specimens.**

| <b>Specimens</b>             | <b>MAE RAS collection number</b> | <b>Grave number</b> |
|------------------------------|----------------------------------|---------------------|
| <b>Yuzhnyy Oleni Ostrov</b>  |                                  |                     |
| UzOO 7                       | 5773-7                           | 56                  |
| UzOO 8                       | 5773-8                           | 57                  |
| UzOO 16                      | 5773-16                          | 60                  |
| UzOO 40                      | 5773-40                          | 39/1                |
| UzOO 43                      | 5773-43                          | 95                  |
| UzOO 46                      | 5773-46                          | 69                  |
| UzOO 70                      | 5773-70                          | 118                 |
| UzOO 74                      | 5773-74                          | 142                 |
| UzOO 77                      | 5773-77                          | 54                  |
| <b>Popovo</b>                |                                  |                     |
| Po2                          | 6836-2                           | 2                   |
| Po4                          | 6836-4                           | 4                   |
| <b>Bol'shoy Oleni Ostrov</b> |                                  |                     |
| BOO49-1                      | 4952-1                           | 2                   |
| BOO49-2                      | 4952-2                           | 3                   |
| BOO49-3                      | 4952-3                           | 4                   |
| BOO49-4                      | 4952-4                           | 5                   |
| BOO49-5                      | 4952-5                           |                     |
| BOO49-6                      | 4952-6                           | 8                   |
| BOO57-1                      | 5715-1                           | III                 |
| BOO57-3                      | 5715-3                           | V                   |
| BOO72-1                      | 7265-1                           | 12, s.1             |
| BOO72-2                      | 7265-2                           | 14, s.1             |
| BOO72-3                      | 7265-3                           | 15, s.1             |
| BOO72-4                      | 7265-4                           | 16, s.1             |
| BOO72-5                      | 7265-5                           | 16, s.2             |
| BOO72-6                      | 7265-6                           | 16, s.3             |
| BOO72-7                      | 7265-7                           | 16, s.4             |
| BOO72-8                      | 7265-8                           | 17, s.1             |
| BOO72-9                      | 7265-9                           | 17, s.2             |
| BOO72-10                     | 7265-10                          | 17, s.3             |
| BOO72-11                     | 7265-11                          | 17, s.4             |
| BOO72-12                     | 7265-12                          | 19, s.1             |
| BOO72-13                     | 7265-13                          | 19, s.2             |
| BOO72-14                     | 7265-14                          | 19, s.3             |
| BOO72-15                     | 7265-15                          | 19, s.4             |

MAE RAS, Museum of Anthropology and Enthnography, Russian Academy of Sciences;  
s, sepulture
